Anesthesiologists Task Force on Management of the Difficult Airway: Practice guidelines for management of the difficult airway: An updated report by the American Society of Anesthesiologists Task Force on Management of the Difficult Airway. *ANESTHESIOLOGY* 2013; 118:251–70

2. Frerk C, Mitchell VS, McNarry AF, Mendonca C, Bhagrath R, Patel A, O'Sullivan EP, Woodall NM, Ahmad I; Difficult Airway Society Intubation Guidelines Working Group: Difficult Airway Society 2015 guidelines for management of unanticipated difficult intubation in adults. *Br J Anaesth* 2015; 115:827–48
3. Japanese Society of Anesthesiologists: JSA airway management guideline 2014: To improve the safety of induction of anesthesia. *J Anesth* 2014; 28:482–93
4. Asai T: Emergency cricothyrotomy: Toward a safer and more reliable rescue method in “cannot intubate, cannot oxygenate” situation. *ANESTHESIOLOGY* 2015; 123:995–6
5. Heymans F, Feigle G, Graber S, Courvoisier DS, Weber KM, Dulguerov P: Emergent cricothyrotomy performed by surgical airway naïve medical personnel: A randomized cross over study in cadavers comparing three commonly used techniques. *ANESTHESIOLOGY* 2016; 125:295–303
6. Cook TM, Woodall N, Frerk C; Fourth National Audit Project: Major complications of airway management in the UK: Results of the Fourth National Audit Project of the Royal College of Anaesthetists and the Difficult Airway Society. Part 1: Anaesthesia. *Br J Anaesth* 2011; 106:617–31
7. Siddiqui N, Arzola C, Friedman Z, Guerina L, You-Ten KE: Ultrasound improves cricothyrotomy success in cadavers with poorly defined neck anatomy: A randomized control trial. *ANESTHESIOLOGY* 2015; 123:1033–41
8. Asai T: Strategies for difficult airway management—The current state is not ideal. *J Anesth* 2013; 27:157–60

## ANESTHESIOLOGY REFLECTIONS FROM THE WOOD LIBRARY-MUSEUM

### Painter, Poet, and Penultimate Daughter of Etherist Crawford Long: Emma Mitchell Long

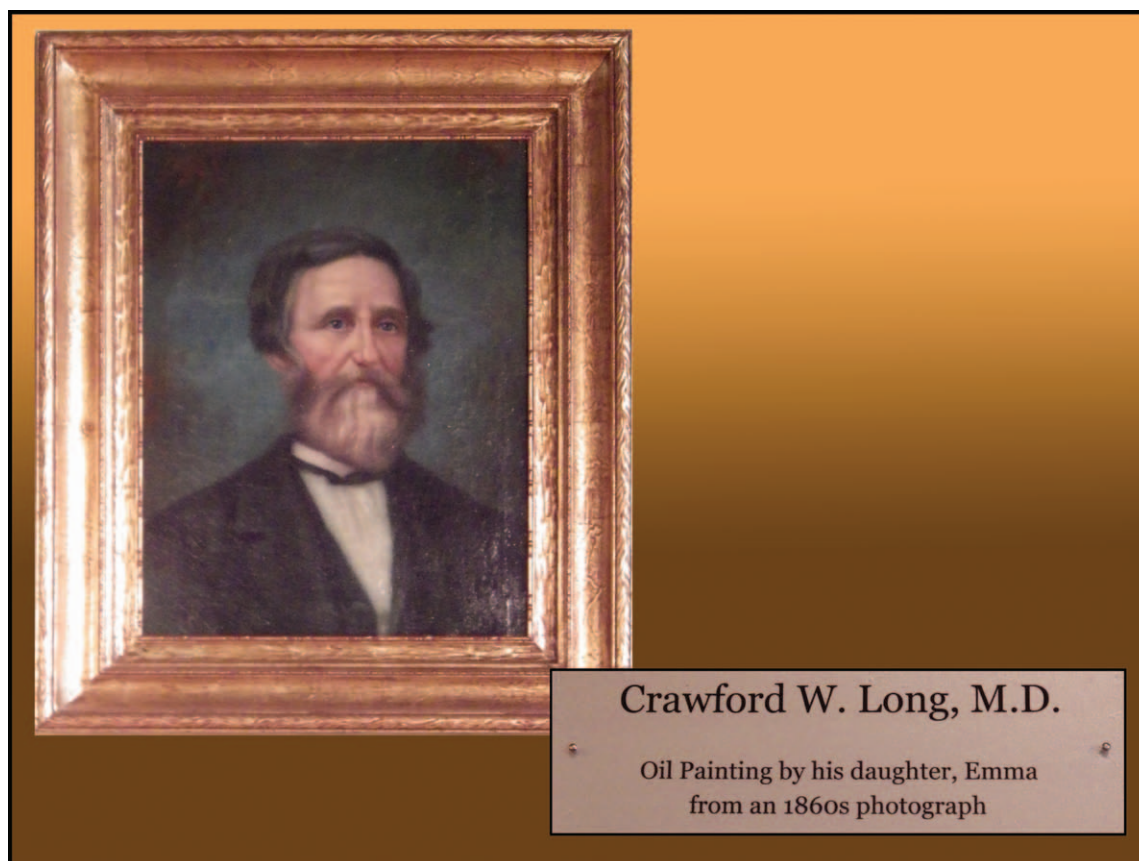

The sixth of seven daughters among the dozen children fathered by ether pioneer Crawford W. Long, M.D., Emma Mitchell Long (1859 to 1935) was among the lucky seven Long children to survive childhood. Following Dr. Crawford Long's death, Emma fearlessly and poetically advocated on behalf of her father's claims as the world's first surgical etherist: "Father, thy tender voice will never cheer / Our home again, / No more its tones will soothe our fear / Or chase away our pain.... Though known to few, thy unrewarded fame / Was truly won. / Some day thy Nation's heart shall proudly claim / Her gifted son." An artist as well as a poet, Emma Long painted an oil portrait (*left*) of her father that is proudly displayed at his namesake museum in Jefferson, Georgia. Represented on the WLM's Liaison Committee, the Crawford W. Long Museum is only a 70-minute drive from Atlanta's Hartsfield-Jackson International Airport. (Copyright © the American Society of Anesthesiologists' Wood Library-Museum of Anesthesiology)

George S. Bause, M.D., M.P.H., Honorary Curator, ASA's Wood Library-Museum of Anesthesiology, Schaumburg, Illinois, and Clinical Associate Professor, Case Western Reserve University, Cleveland, Ohio. [UJYC@aol.com](mailto:UJYC@aol.com).
